# Supplementary material
Source: PubMed Central journal article supplement (PMC5761579)
Supplement: nox116_suppl_table_s1.pdf [file nox116_suppl_table_s1.pdf]

**Table S1.** Patients Demographic and Clinical Characteristics

| Characteristics                            | Primary LGG<br>(n=41) |      | Primary GBM<br>(n=46) |      | Primary-Recurrent<br>GBM<br>(n=7) |      |
|--------------------------------------------|-----------------------|------|-----------------------|------|-----------------------------------|------|
|                                            | No                    | %    | No                    | %    | No                                | %    |
| <b>Age at the first surgery</b>            |                       |      |                       |      |                                   |      |
| Mean                                       | 44.9                  |      | 45.6                  |      | 50.1                              |      |
| Standard deviation                         | 14.1                  |      | 14.4                  |      | 9.7                               |      |
| Range                                      | 17-72                 |      | 19-80                 |      | 35-66                             |      |
| <b>Gender</b>                              |                       |      |                       |      |                                   |      |
| Male                                       | 15                    | 36.6 | 28                    | 60.9 | 4                                 | 57.1 |
| Female                                     | 26                    | 63.4 | 18                    | 39.1 | 3                                 | 42.9 |
| <b>Race/ethnicity</b>                      |                       |      |                       |      |                                   |      |
| Han                                        | 39                    | 95.1 | 44                    | 95.7 | 7                                 | 100  |
| Others                                     | 2                     | 4.9  | 2                     | 4.3  | 0                                 | 0    |
| <b>Tumor type</b>                          |                       |      |                       |      |                                   |      |
| Astrocytoma                                | 34                    | 82.9 | 0                     | 0    | 0                                 | 0    |
| Oligoastrocytomas                          | 7                     | 17.1 | 0                     | 0    | 0                                 | 0    |
| Glioblastoma                               | 0                     | 0    | 46                    | 100  | 7                                 | 100  |
| <b>Tumor location</b>                      |                       |      |                       |      |                                   |      |
| Frontal                                    | 12                    | 29.3 | 13                    | 28.3 | 3                                 | 42.9 |
| Temporal                                   | 16                    | 39.0 | 12                    | 26.1 | 2                                 | 28.6 |
| Parietal                                   | 3                     | 7.3  | 2                     | 4.3  | 1                                 | 14.3 |
| Occipital                                  | 2                     | 4.9  | 1                     | 2.2  | 0                                 | 0    |
| Mixed                                      | 7                     | 17.1 | 17                    | 37.0 | 1                                 | 14.3 |
| Other                                      | 1                     | 2.4  | 1                     | 2.2  | 0                                 | 0    |
| <b>Tumor lateralization</b>                |                       |      |                       |      |                                   |      |
| Left                                       | 18                    | 43.9 |                       | 50   | 3                                 | 42.9 |
| Right                                      | 22                    | 53.7 |                       | 47.8 | 4                                 | 57.1 |
| Middle                                     | 1                     | 2.4  |                       | 2.2  | 0                                 | 0    |
| <b>Main symptom of the first diagnosis</b> |                       |      |                       |      |                                   |      |
| High cranial pressure                      | 16                    | 39.0 |                       | 56.5 | 6                                 | 85.7 |
| Tumor bleeding                             | 2                     | 4.9  |                       | 6.5  | 0                                 | 0    |
| Dysuria                                    | 9                     | 22.0 |                       | 19.6 | 0                                 | 0    |
| Epilepsy                                   | 3                     | 7.3  |                       | 10.9 | 0                                 | 0    |
| Others                                     | 4                     | 9.8  |                       | 4.3  | 0                                 | 0    |
| Asymptomatic                               | 7                     | 17.1 |                       | 2.2  | 1                                 | 14.3 |
| <b>Neurosurgical intervention</b>          |                       |      |                       |      |                                   |      |
| Resection                                  | 37                    | 90.2 |                       | 95.7 | 7                                 | 100  |
| Biopsy                                     | 4                     | 9.8  |                       | 4.3  | 0                                 | 0    |
| Lost to follow up                          | 12                    | 29.3 |                       | 34.8 | 0                                 | 0    |
